# Supplementary material for: Genetic characterization of a unique neuroendocrine transdifferentiation prostate circulating tumor cell-derived eXplant model
Source: PubMed Central journal article supplement (PMC7171138; doi:10.1038/s41467-020-15426-2), 2020-04-20
Supplement: 41467_2020_15426_MOESM1_ESM.pdf [file 41467_2020_15426_MOESM1_ESM.pdf]

Supplementary Information

Supplementary Figure Legends – Final version

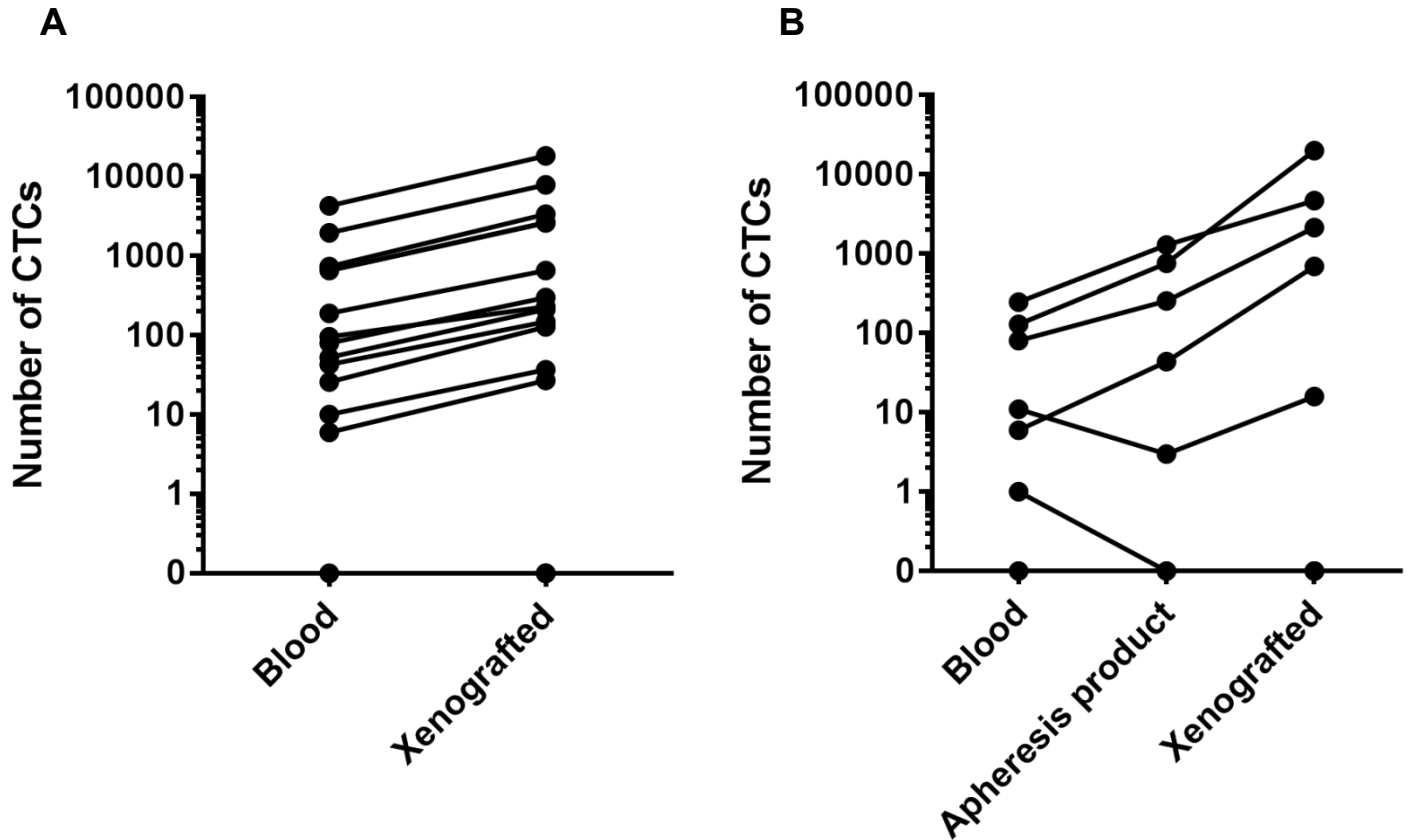

**Supplementary Figure 1: CTC counts in blood samples and DLA products.** (A), CTC counts in 7.5 ml blood and extrapolation of the numbers of xenografted CTCs based on CellSearch counts from patients with peripheral blood sampling only. Lines connect measurements from the same patient. (B), CTC counts in 7.5 ml blood, 200x10<sup>6</sup> cells of DLA products and extrapolation of the numbers of xenografted CTCs based on CellSearch counts in DLA products from patients who underwent DLA. Lines connect measurements from the same patient.

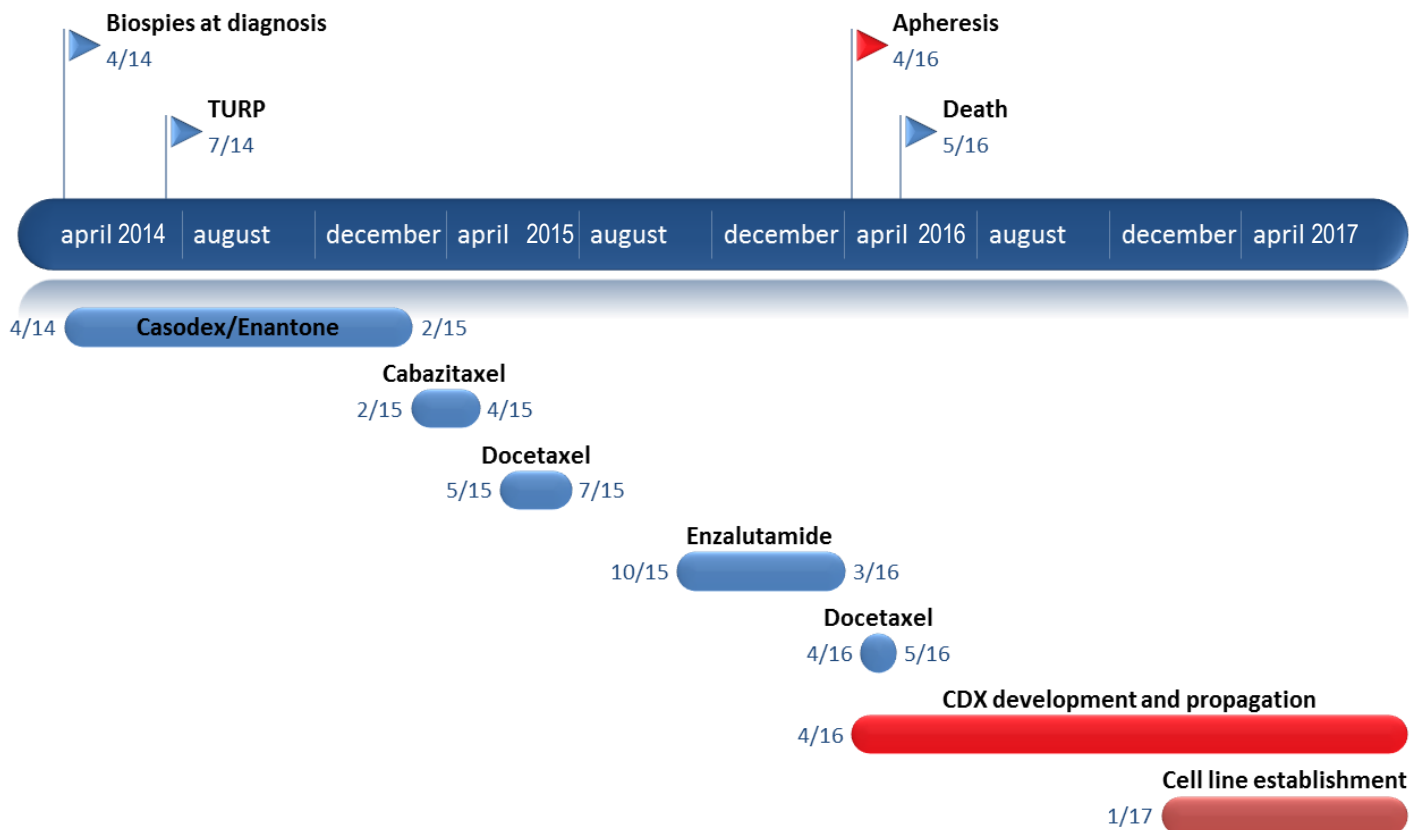

**Supplementary Figure 2: Timelines of treatments, tumor and blood sample collection in Patient 3.** Patient 3 underwent prostate biopsies and transurethral resection of prostate (TURP) on April 14th and July 17th 2014 respectively. On April 7th 2016 the DLA was performed following disease progression on enzalutamide. CTCs isolated from the DLA product were implanted into an NSG mouse leading to a palpable tumor within 165 days after implantation. The CDX was then propagated in successive generation of NSG mice. The cell line was established by sub culturing dissociated CDX tumor cells.

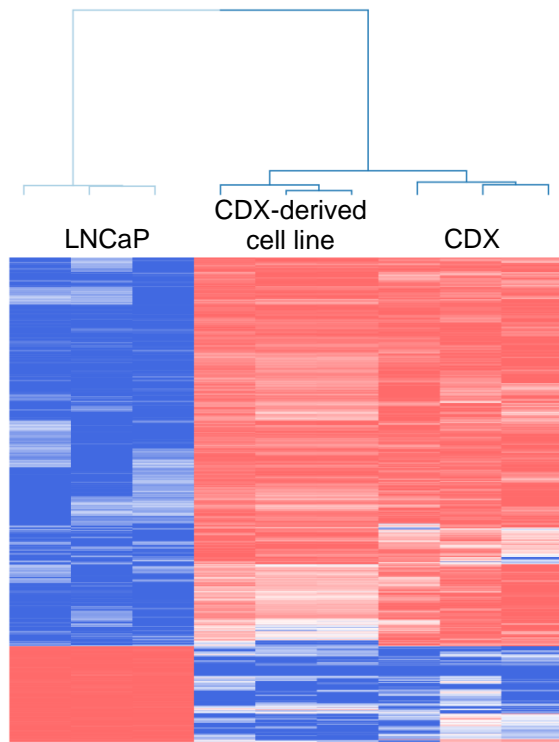

**Heatmap color code**

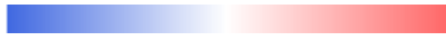

Low expression <----> High expression

**Supplementary Figure 3:** Unsupervised hierarchical clustering of transcriptional profiles of triplicate samples of the LNCaP cell line, the CDX and the CDX-derived cell line. The rows show the normalized expression of the 1000 most variant genes (based on standard deviation) used to classify the samples according to their gene expression patterns.

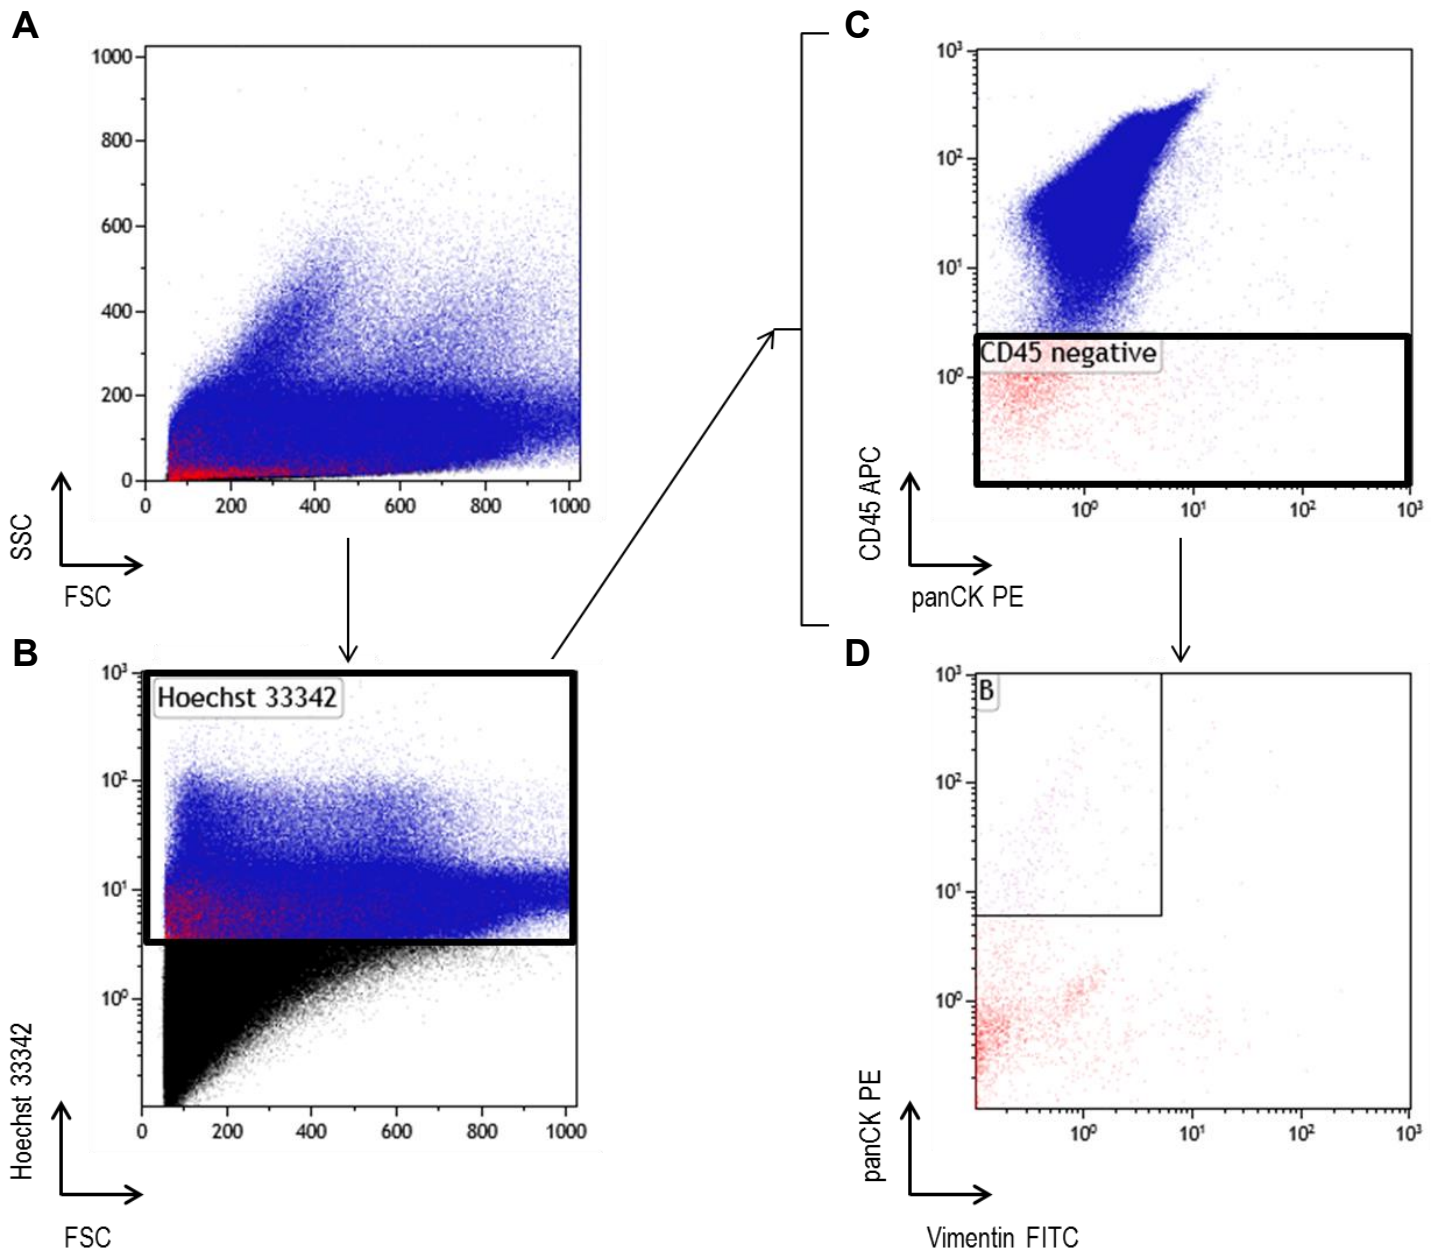

**Supplementary Figure 4: Isolation of CTCs from Patient 3 DLA product by fluorescence activated cell sorting.** (A), Cell selection according to size and granularity. (B), Selection of Hoechst 33342-positive elements according to size. (C), Selection CD45 negative and pan-cytokeratin positive cells. (D), Selection of Hoechst 33342-positive, CD45-negative, pan-cytokeratin positive CTCs.

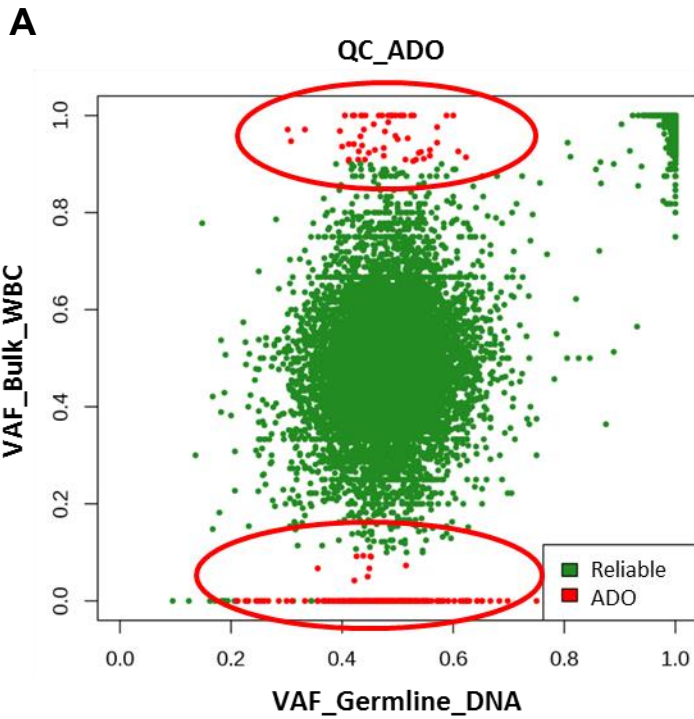

**Proportion of germline variants with ADO**  
 0.012648147

**B**

| Sample | Number of false positive variants | Number of target bases covered $\geq 8X$ | False positive rate |
|--------|-----------------------------------|------------------------------------------|---------------------|
| CTC-1  | 236                               | 33651882                                 | 7.01E-06            |
| CTC-2  | 612                               | 29475505                                 | 2.0763E-05          |
| CTC-3  | 351                               | 34740902                                 | 1.01034E-05         |
| CTC-4  | 290                               | 31112974                                 | 9.32087E-06         |
| CTC-5  | 352                               | 29528940                                 | 1.19205E-05         |
| CTC-6  | 393                               | 28570237                                 | 1.37556E-05         |

**Supplementary Figure 5: Statistics of allelic drop out and false positive rate of Patient 3 CTC samples.** (A), Representation of allelic drop out (ADO). Reliable variants, in green, were defined by an equal VAF in both germline DNA and WBC bulk samples. Variants in ADO, in red, were defined by a VAF ranging from 0.2 to 0.8 in germline DNA and  $<0.1$  or  $>0.9$  in WBC bulk. (B), False positive rate in the six CTC samples. To estimate the false positive rates we divided the number of reliable somatic variants not present in bulk tumor samples (PTs and the CDX) by the number of target bases covered  $\geq 8X$  in the same sample.

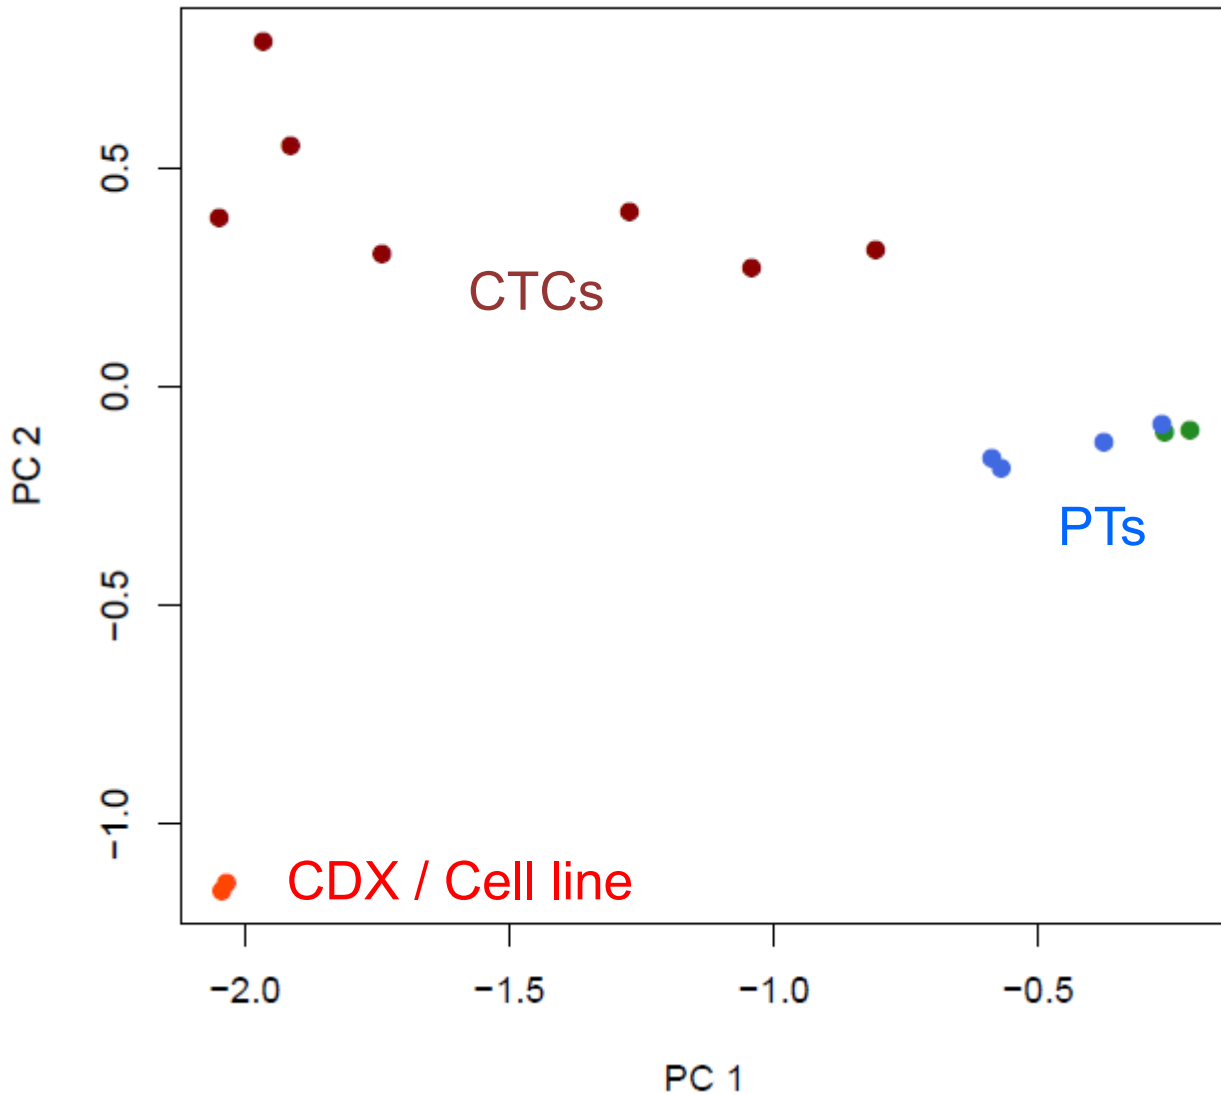

**Supplementary Figure 6: Principal components analysis.** To identify samples with similar mutational profiles, all variants present in at least two samples were selected and classified based on their VAF across these mutations using principal component analysis and hierarchical clustering (Ward method, cosine distance). This method allows to regroup samples sharing the same mutational profile. Three clusters were observed, one gathering all PTs, the second all CTC samples and the third the CDX and the cell line.

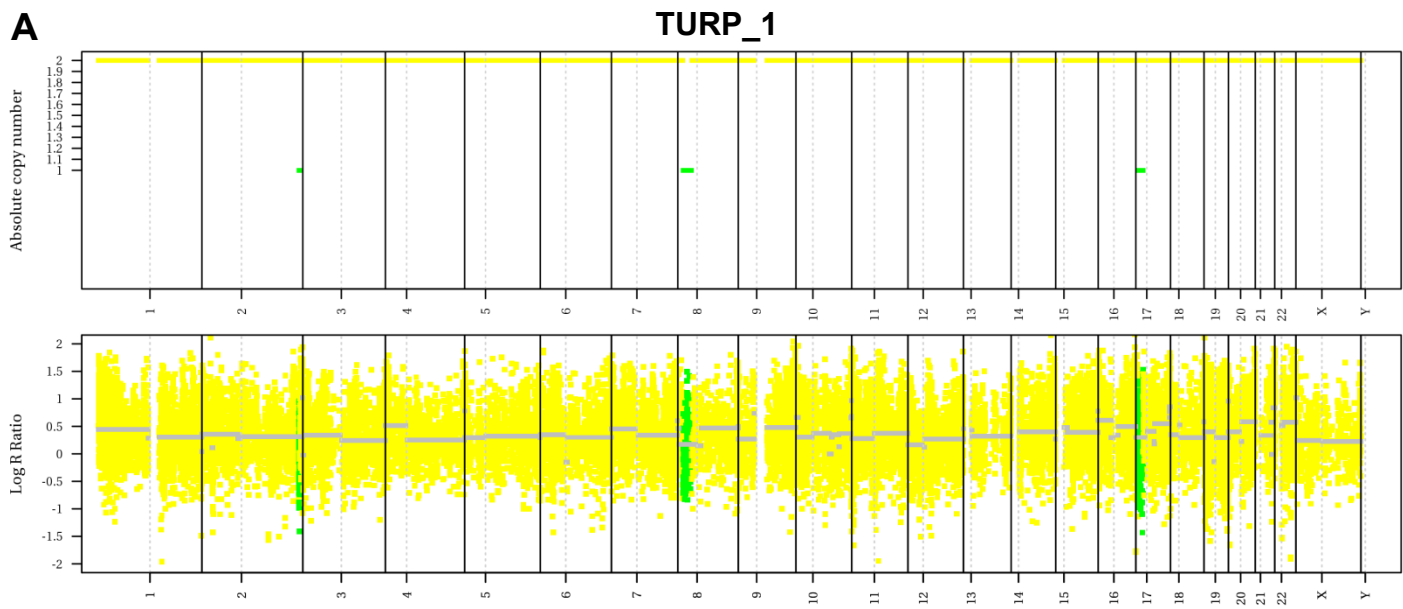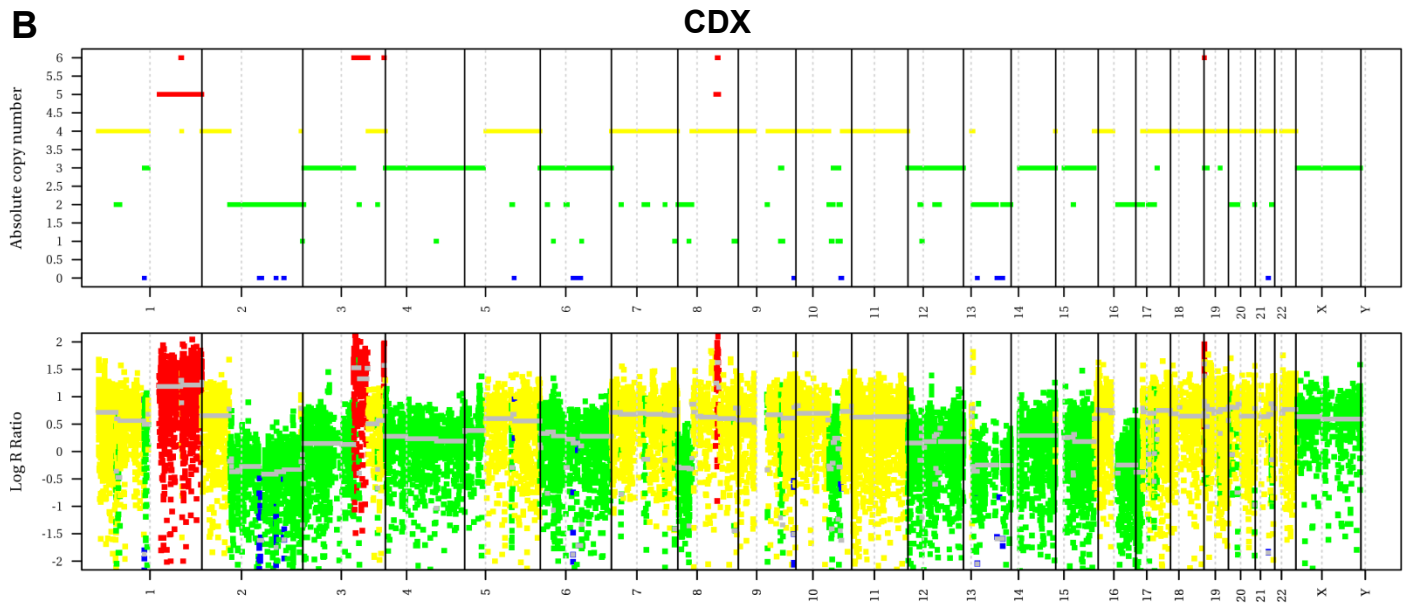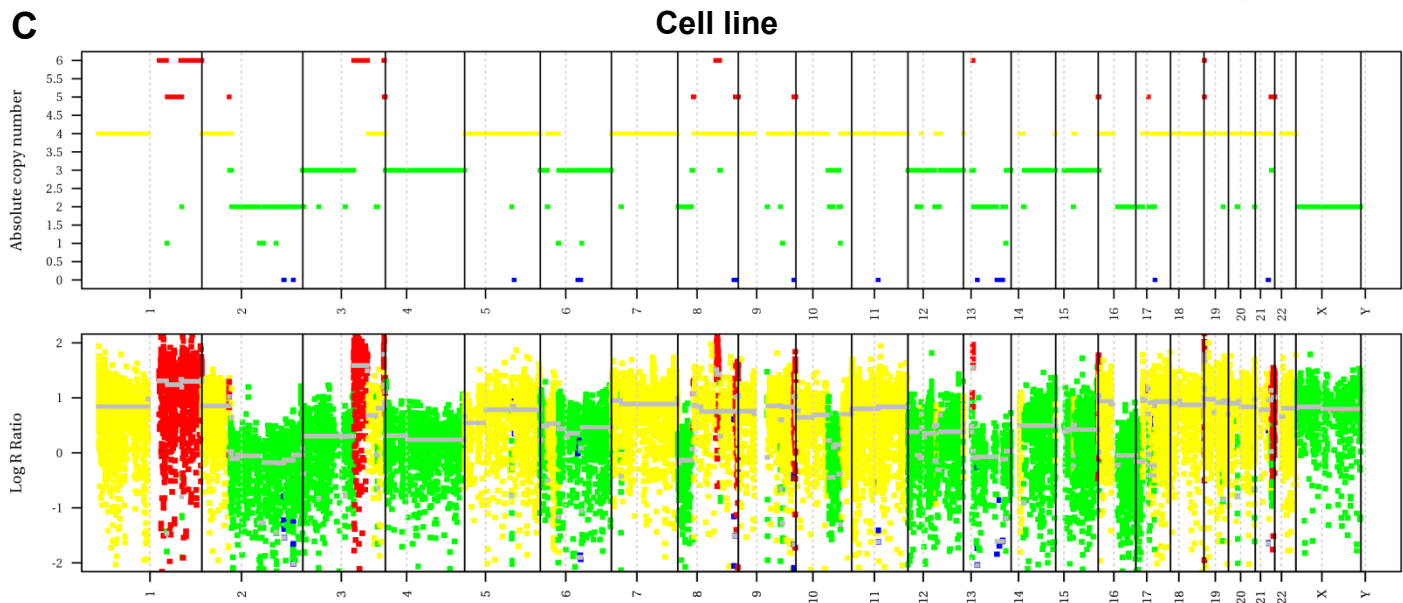

**Supplementary Figure 7: Absolute copy number and log R ratio (LRR) profiles of TURP\_1 (A), CDX (B) and the cell line (C).** In each sample, yellow represented the normal/major copy number/LRR, red represented gains, green represented loss and blue represented homozygous deletion.



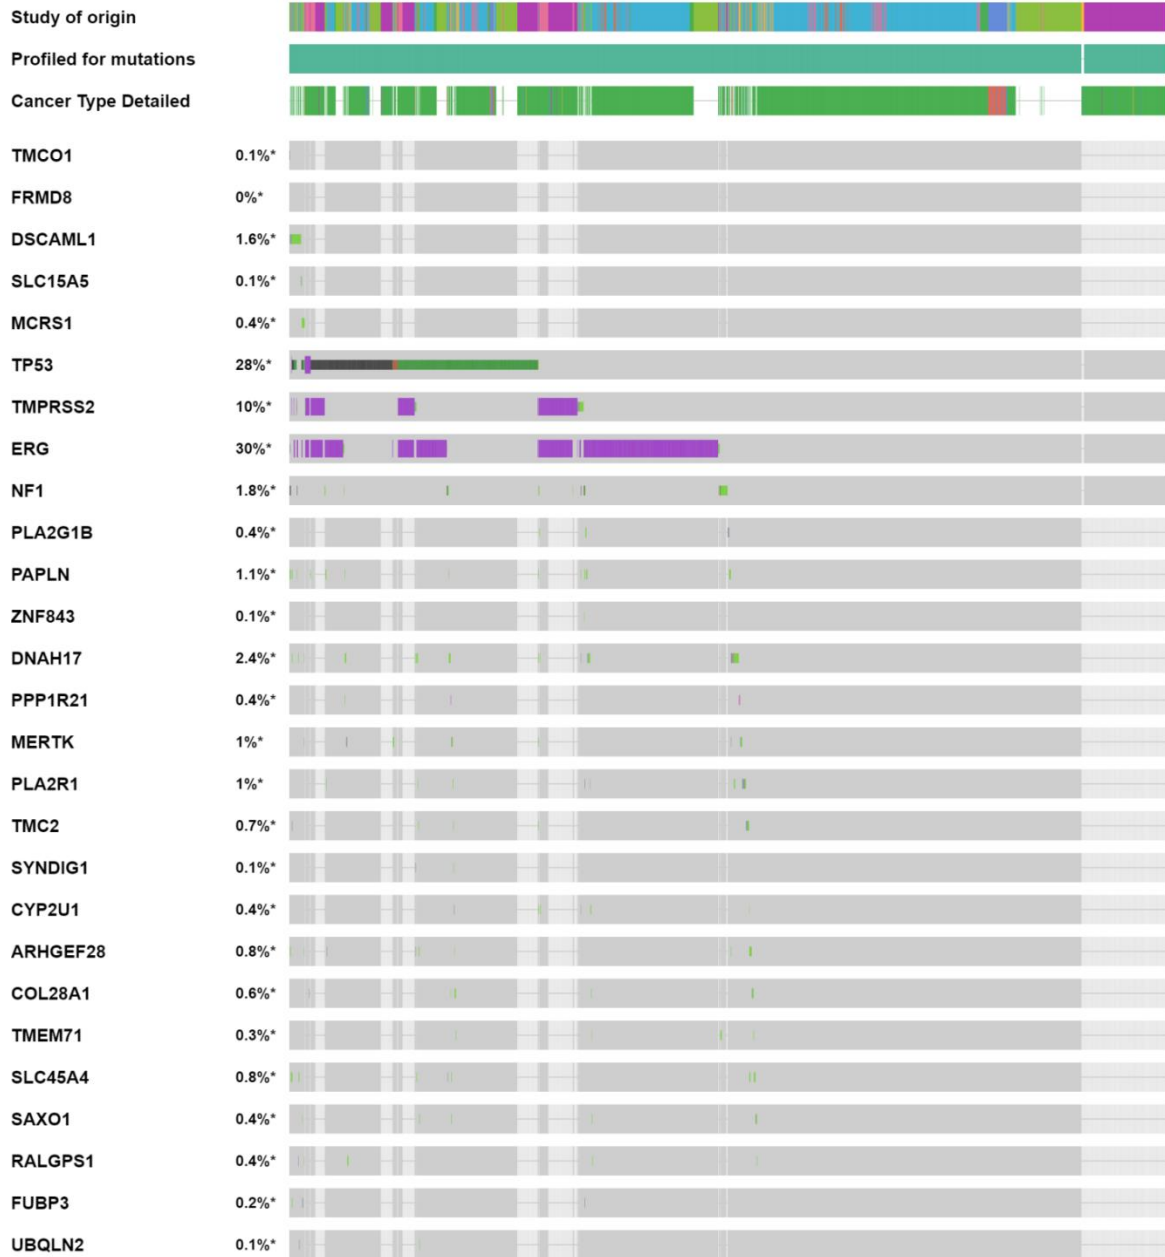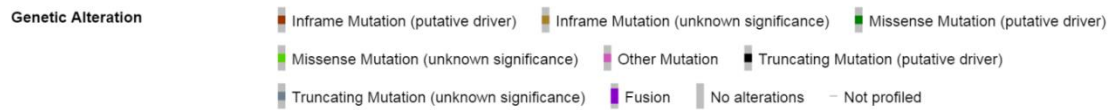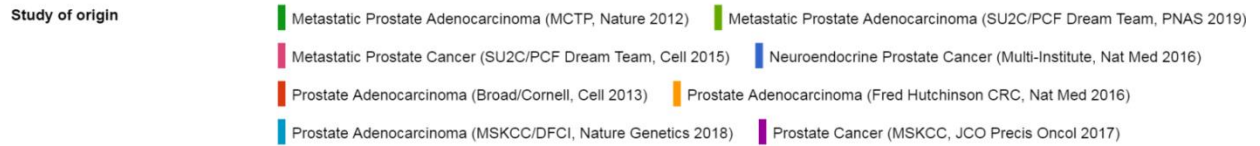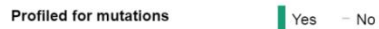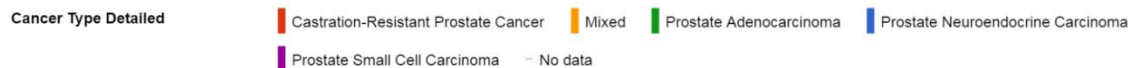

**Supplementary Figure 8: Percentage of CDX trunk genetic alterations (SNVs/INDELS) in 8 cBioPortal studies.** The percentages of samples harboring trunk genetic alterations in each gene are presented. The 8 interrogated studies <sup>1-8</sup> gathered 2,604 prostate tumor samples.

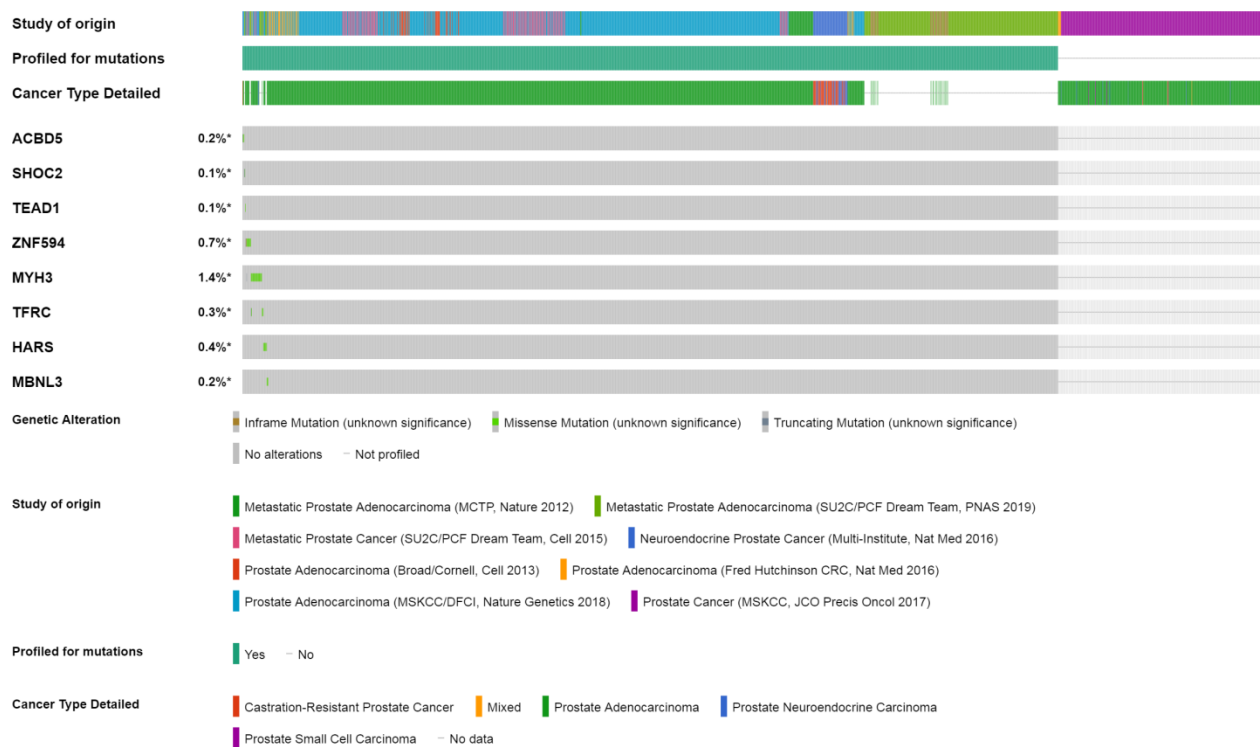

**Supplementary Figure 9: Percentage of SNVs/INDELS acquired by the CDX in 8 cBioPortal studies.** The percentages of samples harboring SNVs/INDELS in each gene are presented. The 8 interrogated studies<sup>1-8</sup> gathered 2,604 prostate tumor samples.

# A

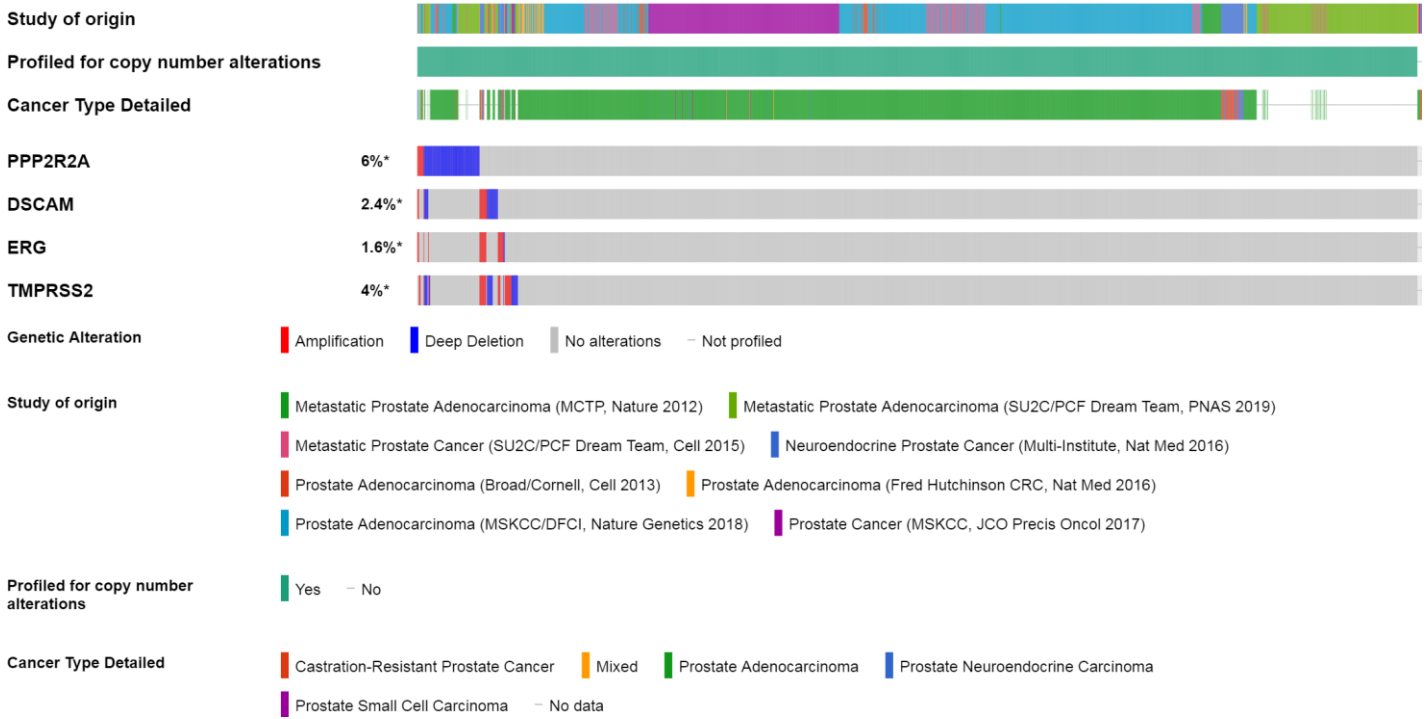

# B

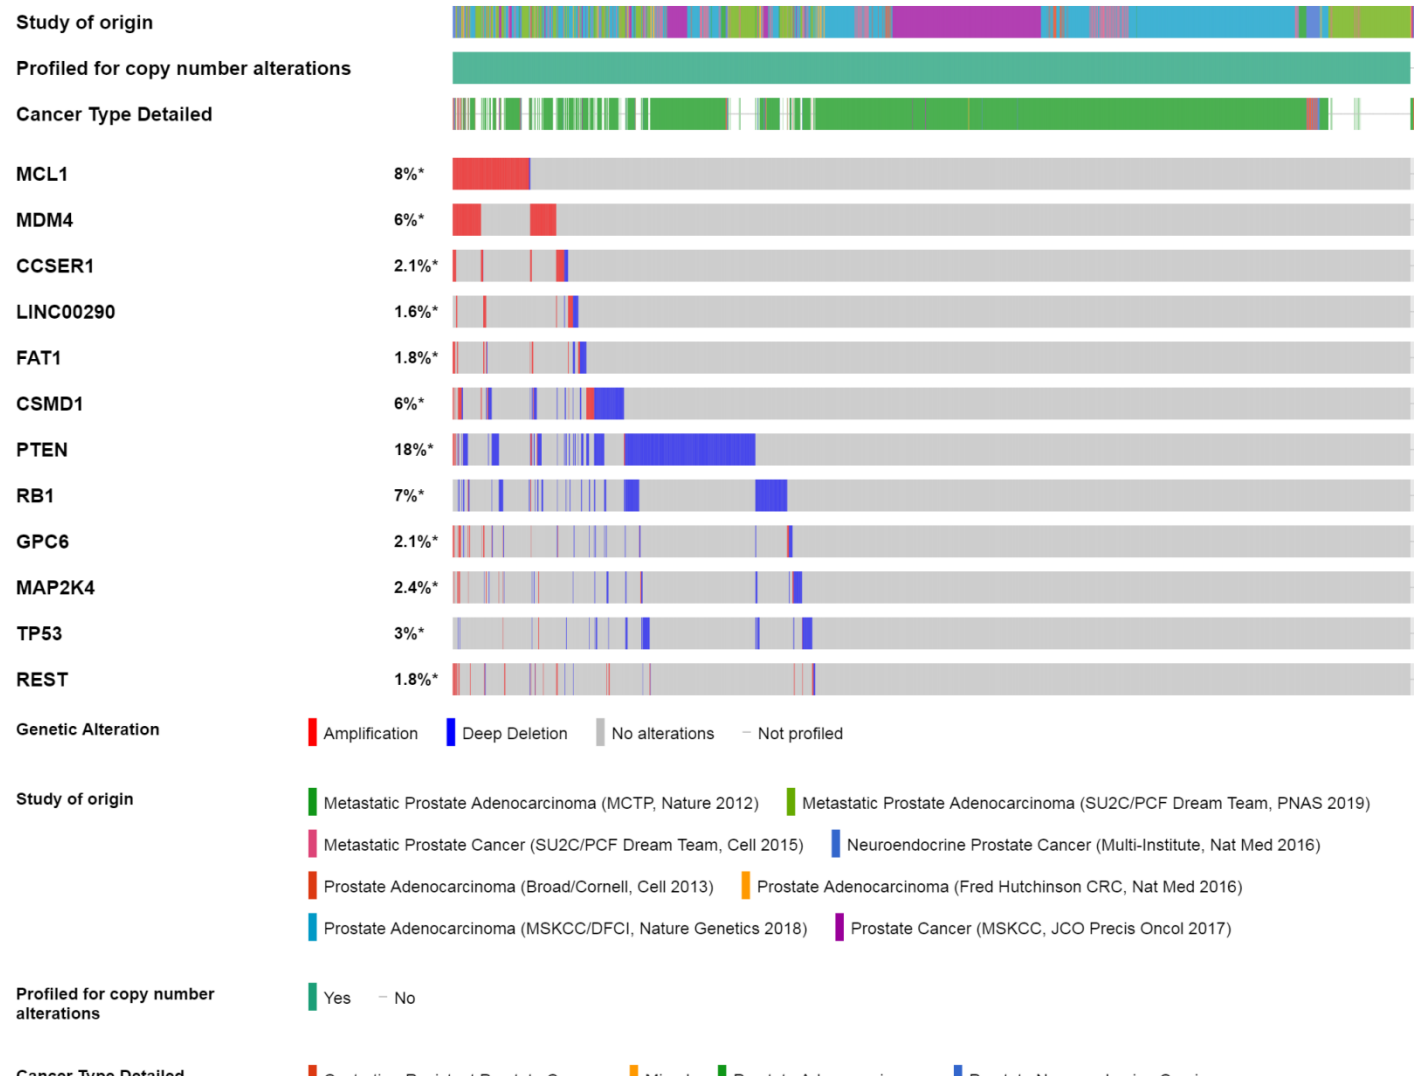

**Supplementary Figure 10: Percentage of CDX truncal or acquired CNAs in 8 cBioPortal studies.** Genes bearing trunk (A) or acquired (B) CNAs were analyzed according to the 8 studies. The percentages of samples harboring truncal or acquired CNAs or each gene are reported. The 8 interrogated studies <sup>1-8</sup> gathered 2,604 prostate tumor samples.

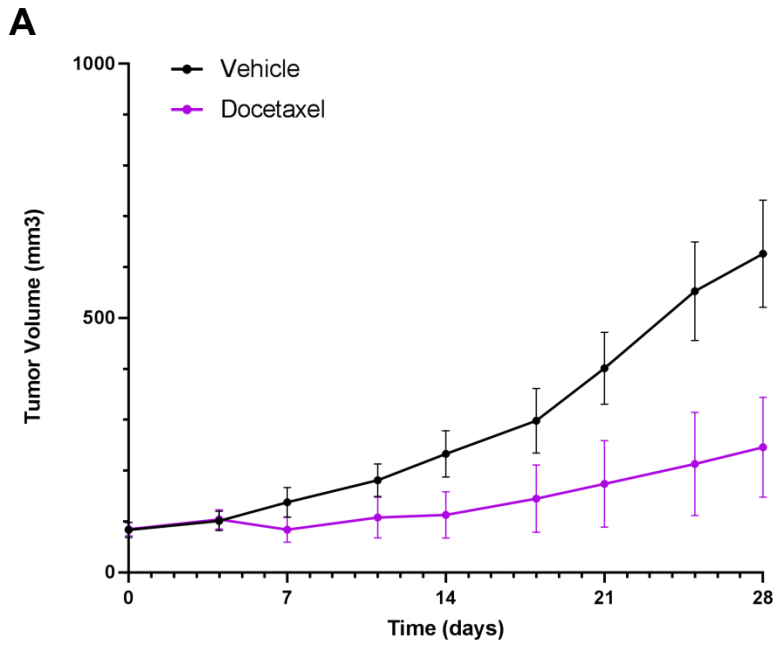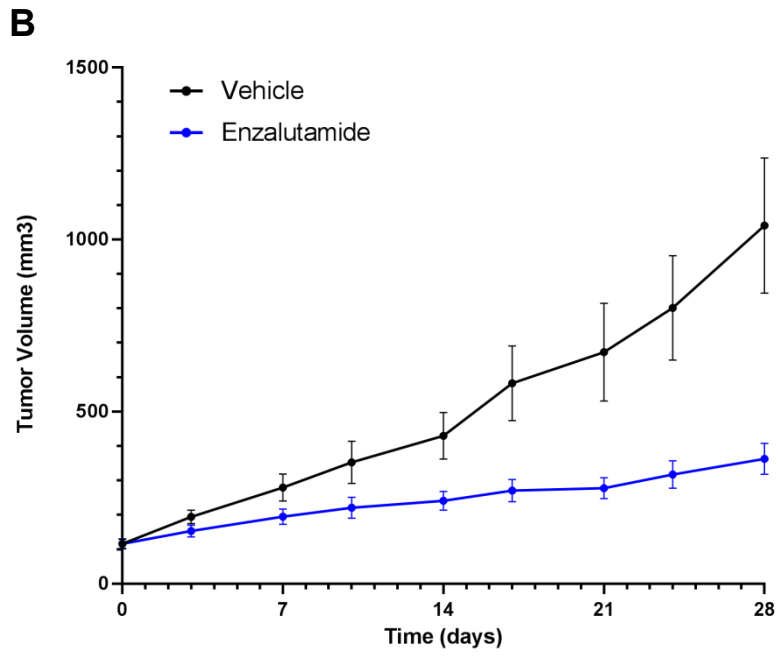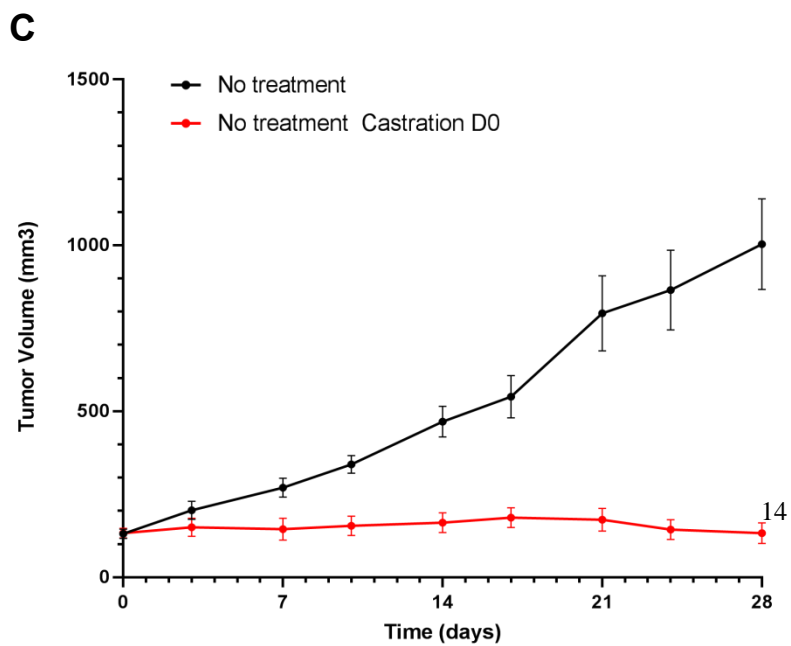

**Supplementary Figure 11: *In vivo* drug assays performed using the PAC120 xenograft model.** PAC120 is sensitive to docetaxel (**A**), enzalutamide (**B**) and castration (**C**). Non-castrated mice bearing tumors were treated with docetaxel, enzalutamide or the vehicle and the tumor volumes were monitored. A control group of mice receiving the vehicle was surgically castrated. In each group n=10 animals. Tumor volumes of vehicle and treated-groups over time after randomization are shown. Data represent mean tumor volumes  $\pm$  s.e.m.

## Supplementary Tables

**Supplementary Table 1** : List of antibodies used for IHC and staining conditions

| Antibodies     | Manufacturer      | Reference         | Clone         | Species | Dilution | Antigen retrieval |
|----------------|-------------------|-------------------|---------------|---------|----------|-------------------|
| AR             | Cell signaling    | #5153             | D6F11         | Rabbit  | 1/50     | 40 minutes        |
| CD44           | Thermo Scientific | MS-668-P          | 156-3C11      | Mouse   | 1/300    | 20 minutes        |
| Chromogranin A | DAKO              | #M0869            | DAK-A3        | Mouse   | 1/50     | 40 minutes        |
| CK7            | DAKO              | #M7018            | OV-TL-12/30   | Mouse   | 1/50     | 40 minutes        |
| CK8.18         | Novocastra        | #NCL-L-CK5/6/8/18 | 5D3, LP34     | Mouse   | 1/100    | 40 minutes        |
| Epcam          | Cell signaling    | #2929S            | VU1D9         | Mouse   | 1/500    | 40 minutes        |
| Ki67           | DAKO              | #M7240            | MIB-1         | Mouse   | 1/50     | 40 minutes        |
| NSE            | DAKO              | #M0873            | BBS/NC/VI-H14 | Mouse   | 1/100    | 40 minutes        |
| PSA            | DAKO              | #M075029-2        | ER-PR8        | Mouse   | 1/50     | 40 minutes        |
| Synaptophysin  | DAKO              | #M7315            | DAK-SYNAP     | Mouse   | 1/16     | 60 minutes        |
| Vimentin       | Santa Cruz        | #SC-6260          | V9            | Mouse   | 1/500    | no                |

**Supplementary Table 2**: List of antibodies used for FACS analyses

| Antibodies       | Manufacturer  | Reference   | Clone         | Species | Fluorochrome | Dilution | Isotypes |
|------------------|---------------|-------------|---------------|---------|--------------|----------|----------|
| EpCAM            | BD Pharmingen | 347200      | EBA-1         | Mouse   | APC          | 1/20     | Ms IgG1  |
| CD133-2          | Miltenyi      | 130-098-046 | 293C3         | Mouse   | PE           | 1/10     | Ms IgG2b |
| CD166            | R&D system    | FAB6561P    | 105902        | Mouse   | PE           | 1/100    | Ms IgG1  |
| Pan-cytokeratins | ebioscience   | 53-9003-82  | AE1/AE3       | Mouse   | AF488        | 1/100    | Ms IgG1  |
| E-cadherin       | BD Pharmingen | 560061      | 36/E-Cadherin | Mouse   | AF488        | 1/200    | Ms IgG2a |



**Supplementary Table 3:** Number of variants identified in PT specimens, the CDX and the CDX-derived cell line.

| <b>Sample</b> | <b>Mean Depth</b> | <b>Median Depth</b> | <b>Coverage above 25X</b> | <b>SNVs</b> | <b>INDELs</b> | <b>SNVs + INDELs</b> |
|---------------|-------------------|---------------------|---------------------------|-------------|---------------|----------------------|
| TURP_1        | 130               | 98                  | 89                        | 24          | 22            | 46                   |
| TURP_2        | 130               | 104                 | 90                        | 40          | 23            | 63                   |
| Biopsy_1      | 81                | 46                  | 80                        | 40          | 17            | 57                   |
| Biopsy_2      | 144               | 72                  | 86                        | 26          | 17            | 43                   |
| Biopsy_3      | 149               | 72                  | 85                        | 30          | 13            | 43                   |
| Biopsy_4      | 98                | 61                  | 86                        | 12          | 3             | 15                   |
| Biopsy_5      | 133               | 69                  | 85                        | 23          | 20            | 43                   |
| Biopsy_6      | 130               | 67                  | 85                        | 36          | 30            | 66                   |
| CDX           | 109               | 80                  | 81                        | 72          | 8             | 80                   |
| Cell line     | 123               | 91                  | 83                        | 77          | 8             | 85                   |

**Supplementary Table 4:** Number of high-confidence variants identified in CTC samples.

| Sample | Mean Depth | Median Depth | Coverage above 25X | SNVs shared by at least 2 CTCs | SNVs shared by at least 1 CTC and 1 PT | SNVs shared by at least 1 CTC and the CDX/Cell line | High-confidence SNVs* | INDELs shared by at least 2 CTCs | INDELs shared by at least 1 CTC and 1 PT | INDELs shared by at least 1 CTC and the CDX/Cell line | High-confidence INDELs** | High-confidence SNVs + INDELs |
|--------|------------|--------------|--------------------|--------------------------------|----------------------------------------|-----------------------------------------------------|-----------------------|----------------------------------|------------------------------------------|-------------------------------------------------------|--------------------------|-------------------------------|
| CTC-1  | 88         | 23           | 51                 | 21                             | 10                                     | 11                                                  | 22                    | 6                                | 1                                        | 2                                                     | 6                        | 28                            |
| CTC-2  | 90         | 14           | 45                 | 24                             | 11                                     | 13                                                  | 25                    | 10                               | 3                                        | 4                                                     | 10                       | 35                            |
| CTC-3  | 88         | 26           | 53                 | 23                             | 13                                     | 15                                                  | 24                    | 4                                | 2                                        | 3                                                     | 4                        | 28                            |
| CTC-4  | 87         | 18           | 48                 | 20                             | 11                                     | 13                                                  | 23                    | 3                                | 2                                        | 3                                                     | 3                        | 26                            |
| CTC-5  | 102        | 15           | 46                 | 26                             | 13                                     | 17                                                  | 27                    | 10                               | 2                                        | 4                                                     | 10                       | 37                            |
| CTC-6  | 93         | 12           | 44                 | 20                             | 12                                     | 17                                                  | 23                    | 8                                | 3                                        | 5                                                     | 8                        | 31                            |

\* High-confidence SNVs were obtained by adding SNVs shared by at least 2 CTCs, SNVs shared by at least 1 CTC and 1 PT, SNVs shared by 1 CTC and the CDX/Cell line, Duplicates were considered only once.

\*\* High-confidence INDELs were obtained by adding INDELs shared by at least 2 CTCs, INDELs shared by at least 1 CTC and 1 PT, INDELs shared by 1 CTC and the CDX/Cell line, Duplicates were considered only once.

## References

- 1 Beltran, H. *et al.* Divergent clonal evolution of castration-resistant neuroendocrine prostate cancer. *Nat Med* **22**, 298-305, doi:10.1038/nm.4045 (2016).
- 2 Grasso, C. S. *et al.* The mutational landscape of lethal castration-resistant prostate cancer. *Nature* **487**, 239-243, doi:10.1038/nature11125 (2012).
- 3 Baca, S. C. *et al.* Punctuated evolution of prostate cancer genomes. *Cell* **153**, 666-677, doi:10.1016/j.cell.2013.03.021 (2013).
- 4 Abida, W. *et al.* Prospective Genomic Profiling of Prostate Cancer Across Disease States Reveals Germline and Somatic Alterations That May Affect Clinical Decision Making. *JCO Precis Oncol* **2017**, doi:10.1200/PO.17.00029 (2017).
- 5 Armenia, J. *et al.* The long tail of oncogenic drivers in prostate cancer. *Nat Genet* **50**, 645-651, doi:10.1038/s41588-018-0078-z (2018).
- 6 Kumar, A. *et al.* Substantial interindividual and limited intraindividual genomic diversity among tumors from men with metastatic prostate cancer. *Nat Med* **22**, 369-378, doi:10.1038/nm.4053 (2016).
- 7 Robinson, D. *et al.* Integrative clinical genomics of advanced prostate cancer. *Cell* **161**, 1215-1228, doi:10.1016/j.cell.2015.05.001 (2015).
- 8 Abida, W. *et al.* Genomic correlates of clinical outcome in advanced prostate cancer. *Proc Natl Acad Sci U S A* **116**, 11428-11436, doi:10.1073/pnas.1902651116 (2019).
