# Supplementary material for: Genetic characterization of a unique neuroendocrine transdifferentiation prostate circulating tumor cell-derived eXplant model
Source: PubMed Central journal article supplement (PMC7171138; doi:10.1038/s41467-020-15426-2), 2020-04-20
Supplement: 41467_2020_15426_MOESM3_ESM.pdf [file 41467_2020_15426_MOESM3_ESM.pdf]

1 **Description of Additional Supplementary Files**

2 **File Name: Supplementary Data 1**

3 **Description:** List of the 250 functional genes that are relevant for CRPC-NE progression and  
4 significantly deregulated in the CDX and the CDX-derived cell line compared to LNCaP cells.  
5 Log<sub>2</sub> fold change, pvalue and qvalue are presented for each gene.

6

7 **File Name: Supplementary Data 2**

8 **Description:** Description of all reliable somatic variants in PTs, CTCs, the CDX and the CDX-  
9 derived cell line.

10
